# Supplementary material for: Adsorption of copper by naturally and artificially aged polystyrene microplastics and subsequent release in simulated gastrointestinal fluid
Source: Royal Society of Chemistry journal article supplement (doi:10.1039/d3em00354j), 2024-01-01
Supplement: d3em00354j1.pdf [file d3em00354j1.pdf]

1  
2  
3  
4  
5  
6  
7  
8  
9  
10  
11  
12

## Supplementary Information

### **Adsorption of Copper by Naturally and Artificially Aged Polystyrene**

### **Microplastics and Subsequent Release in Simulated Gastrointestinal Fluid**

Lu Zhou<sup>a, b</sup>, Thibault Masset<sup>a</sup>, Florian Breider<sup>a\*</sup>

a. Ecole Polytechnique Fédérale de Lausanne — EPFL, Central Environmental  
Laboratory, IIE, ENAC, Station 2, CH-1015 Lausanne, Switzerland

b. State Key Laboratory of Urban Water Resource and Environment, School of  
Environment, Harbin Institute of Technology, Harbin 150090, People's Republic of  
China

#### **\*Corresponding author:**

E-mail: [florian.breider@epfl.ch](mailto:florian.breider@epfl.ch) (Florian Breider)

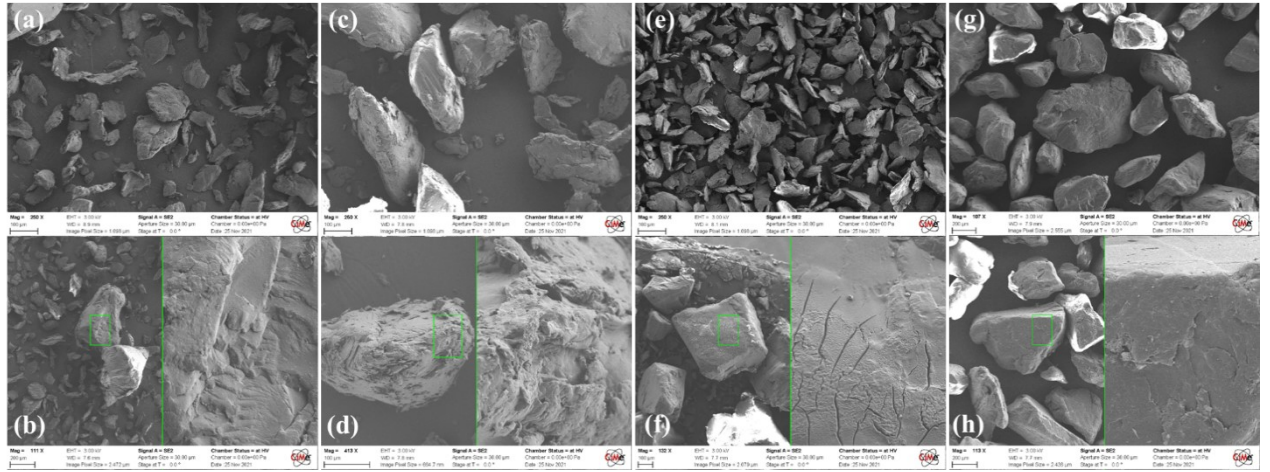

13

14 Figure S1. SEM images of (a), (b) PS-Virgin; (c), (d) PS-O<sub>3</sub>; (e), (f) PS-SS; (g), (h) PS-

15 Lake.

16

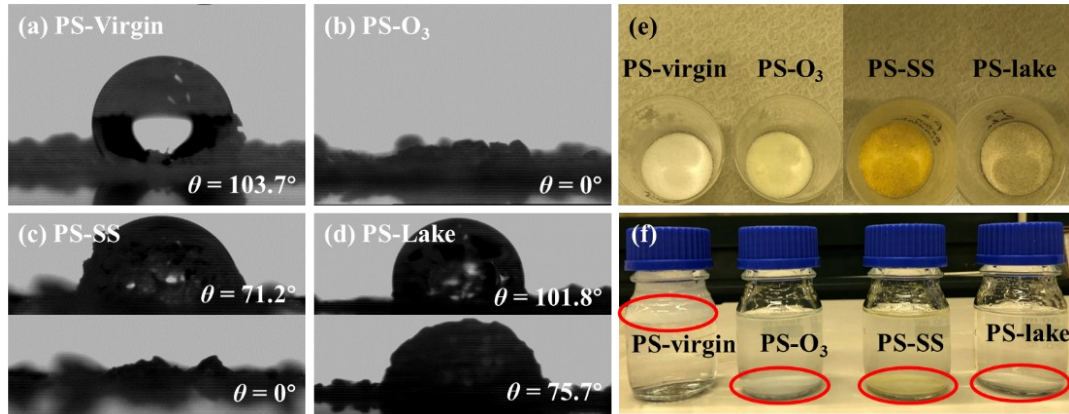

17

18 Figure S2 Contact angle values of ultrapure water on (a) PS-Virgin, (b) PS-O<sub>3</sub>, (c) PS-

19 SS, (d) PS-Lake; (e) Color, and (f) Standing state in water of PS-Virgin, PS-O<sub>3</sub>, PS-SS,

20 PS-Lake.

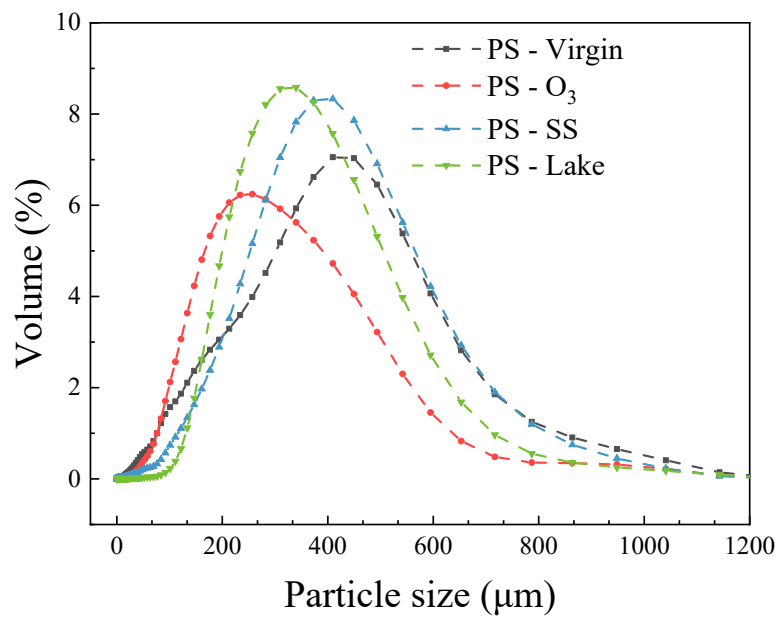

21

22 Figure S3 Size distribution of PS-Virgin, PS-O<sub>3</sub>, PS-SS, PS-Lake.

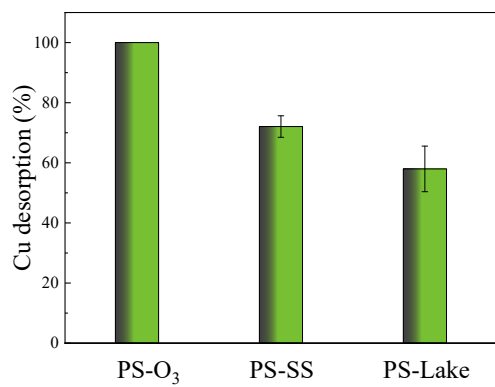

23

24 Figure S4. Cu desorption ratio from PS-O<sub>3</sub>, PS-SS, and PS-Lake in SGF.

25

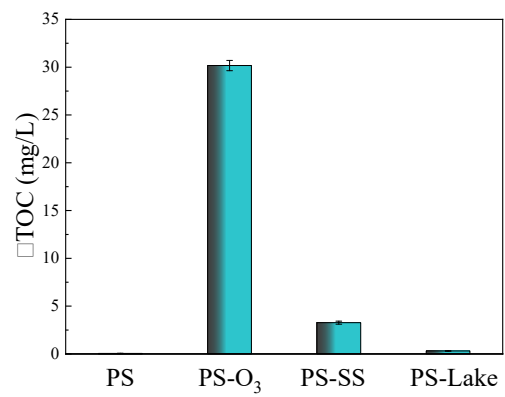

26

27 Figure S5 TOC of released from microplastics after Cu adsorption.

28

29 Table S1 Composition of simulated gastric fluids.<sup>1</sup>

| Composition                   | Concentration (mmol/L) |
|-------------------------------|------------------------|
| Cl <sup>-</sup>               | 153.5                  |
| SO <sub>4</sub> <sup>2-</sup> | 0.9                    |
| Na <sup>+</sup>               | 148.0                  |
| K <sup>+</sup>                | 3.0                    |
| Mg <sup>2+</sup>              | 0.9                    |
| Ca <sup>2+</sup>              | 1.3                    |
| Galactose                     | 5.0                    |
| Na-Pyruvate                   | 5.0                    |
| Pepsin                        | 0.2                    |
| pH                            | 2.0                    |

30

31 Table S2 The D10, D50 and D90 for the size distribution of PS-Virgin, PS-O<sub>3</sub>, PS-SS,

32 PS-Lake.

|                   | D10/ $\mu\text{m}$ | D50/ $\mu\text{m}$ | D90/ $\mu\text{m}$ |
|-------------------|--------------------|--------------------|--------------------|
| PS-Virgin         | 92                 | 310                | 594                |
| PS-O <sub>3</sub> | 101                | 233                | 449                |
| PS-SS             | 146                | 338                | 593                |
| PS-Lake           | 175                | 308                | 494                |

33



34 Table S3 The pseudo-second-order kinetic constants for Cu adsorption on PS-SS and

35 PS-Lake.

| MPs     | $k_2(10^{-2} \mu\text{g/g min})$ | $q_e(\mu\text{g/g})$ | $R^2$ |
|---------|----------------------------------|----------------------|-------|
| PS-SS   | 0.87                             | 81.97                | 0.999 |
| PS-Lake | 0.20                             | 113.64               | 0.993 |

36

37 Table S4 Change of dissolved Cu in SGF with the existence of PS particles compared

38 with food only.

| Food                  | Food quantity | PS-Virgin | PS-O <sub>3</sub> | PS-SS   | PS-Lake |
|-----------------------|---------------|-----------|-------------------|---------|---------|
| <i>Lemna minor</i>    | low food      | -2.50%    | 63.19%            | 204.63% | 197.21% |
|                       | medium food   | 8.79%     | 27.01%            | 94.05%  | 103.81% |
|                       | high food     | 1.49%     | 1.92%             | 59.59%  | 73.85%  |
| <i>Gammarus pulex</i> | low food      | -0.89%    | 12.34%            | 39.16%  | 106.90% |
|                       | medium food   | 1.13%     | 5.77%             | 30.65%  | 61.35%  |
|                       | high food     | -0.92%    | 2.18%             | 9.17%   | 16.96%  |

39

40 **REFERENCES**

- 41 [1] Masset, T.; Ferrari, B. J. D.; Oldham, D.; Dufey, W.; Minghetti, M.; Schirmer,  
42 K.; Bergmann, A.; Vermeirssen, E.; Breider, F., In Vitro Digestion of Tire  
43 Particles in a Fish Model (*Oncorhynchus mykiss*): Solubilization Kinetics of  
44 Heavy Metals and Effects of Food Coingestion. *Environ Sci Technol* **2021**, *55*  
45 (23), 15788-15796.
